# Supplementary material for: Discovery of potential anti-infectives against Staphylococcus aureus using a Caenorhabditis elegans infection model
Source: BMC Complement Altern Med. 2014 Jan 6;14:4. doi: 10.1186/1472-6882-14-4 (PMC3893568; doi:10.1186/1472-6882-14-4)
Supplement: Additional file 1 — The source and voucher number of plant materials/marine sample for all extracts provided by the Institute for Pharmaceuticals and Neutraceuticals Malaysia (IPharm) and Universiti Malaysia Terengganu. [file 1472-6882-14-4-S1.xlsx]

## Sheet: Sheet1
Plant species	Source	Name of person identified the sample	Herbarium/ Marine resource center	Voucher number
Nypa fruticans	Terengganu, Malaysia.	Lukman Hakim	Universiti Malaysia Terengganu	NF-001
Faunus ater	Terengganu, Malaysia.	Lukman Hakim	Universiti Malaysia Terengganu	FA-001
Swietenia macrophylla	Kedah, Malaysia.	Komala Dharmalingam	Universiti Sains Malaysia	11245
Tinospora tuberculata	Pahang, Malaysia.	Mohd. Ilham Adenan	Forest Research Institute Malaysia	CfPR-11-121-01
Momordica charantia	Pahang, Malaysia.	Mohd. Ilham Adenan	Forest Research Institute Malaysia	CfPR-11-124-02
Zingiber officinale	Penang, Malaysia.	Saiedatul Akmal	Universiti Sains Malaysia	11239
Alpinia galanga	Penang, Malaysia.	Saiedatul Akmal	Universiti Sains Malaysia	11238
Curcuma longa	Penang, Malaysia.	Saiedatul Akmal	Universiti Sains Malaysia	11242
