# Supplementary material for: Discovery of potential anti-infectives against Staphylococcus aureus using a Caenorhabditis elegans infection model
Source: BMC Complement Altern Med. 2014 Jan 6;14:4. doi: 10.1186/1472-6882-14-4 (PMC3893568; doi:10.1186/1472-6882-14-4)
Supplement: Additional file 2 — Detailed information of all natural extracts and synthetic compounds used in the anti-infective screening. Information of all natural extracts and synthetic compounds were presented along with the results summary of disc diffusion assay and MIC test. [file 1472-6882-14-4-S2.xlsx]

## Sheet: Natural extracts
Species	Plant parts/ animal	Solvent	Source (Location)	ID	Disc Diffusion Test	MIC Test in Standard Medium(µg/mL)	MIC Test in Screening Medium (µg/mL)
Nypa fruticans	husks	methanol	Malaysia	UE-01-1	-	<125	<125
		hexane	Malaysia	UE-01-3	-	-	-
	leaves	butanol	Malaysia	UE-01-5	-	-	-
		hexane	Malaysia	UE-01-2	-	2000	2000
		chloroform	Malaysia	UE-01-7	-	1000	500
	roots	butanol	Malaysia	UE-01-4	-	-	-
		chloroform	Malaysia	UE-01-6	-	2000	2000
Faunus ater	whole animal	methanol	Malaysia (location-1)	UE-02-2	-	-	-
		methanol	Malaysia (location-2)	UE-02-4	-	-	-
		methanol	Malaysia (location-3)	UE-02-5	-	-	-
		methanol	Malaysia (location-4)	UE-02-6	-	-	-
		ethanol	Malaysia	UE-02-1	-	-	-
		ethyl acetate	Malaysia	UE-02-3	-	-	-
Swietenia macrophylla	seeds	methanol	Malaysia (location-1)	UE-03-1	-	-	-
		methanol	Malaysia (location-2)	UE-03-3	-	-	-
		chloroform	Malaysia	UE-03-2	-	-	-
		hexane	Malaysia	UE-03-4	-	-	-
		ethyl acetate	Malaysia	UE-03-5	-	-	-
		butanol	Malaysia	UE-03-6	-	-	-
		water	Malaysia	UE-03-7	-	-	-
Tinospora tuberculata	leaves	water	Malaysia	UE-04	-	-	-
Momordica charantia	fruits	water	Malaysia	UE-05	-	-	-
Zingiber officinale	rhizomes	methanol	Malaysia	UE-06	-	-	-
Alpinia galanga	rhizomes	methanol	Malaysia	UE-07	-	-	-
Curcuma longa	rhizomes	water	Malaysia	UE-08	+	<125	<125
Centella asiatica	leaves	water	Malaysia	UE-09	-	-	-
Andrographis paniculata	leaves	water	Malaysia	UE-10	-	-	-
Eurycoma longifolia	roots	water	Malaysia	UE-11	-	-	-
Orthosiphon stamineus	leaves	water	Malaysia	UE-12	-	-	-
Honey	-	-	Australia	UE-13	-	-	-
Emblica officinalis	fruits	water	India	UE-14	-	-	-
Curcumin	-	-	Merck, Germany	UE-15	+	1000	500
Valeriana officinalis	rhizomes and roots	water	Malaysia	UE-16	-	1000	500
Ginkgo biloba	leaves	water	Japan	UE-17	-	-	-
Silybum eburneum	seeds	water	USA	UE-18	-	-	-
Panax ginseng	roots	water	China	UE-19	-	-	-
Wheatgrass	grass	-	Malaysia	UE-20	-	-	-
					Note: + indicates able to inhibit/kill S. aureus; - indicates unable to inhibit/ kill S. aureus.

## Sheet: Synthetic compounds
ID	Molecular weight (g/mol)	Disc Diffusion Test	MIC Test in Standard Medium(µM)	MIC Test in Screening Medium (µM)
UC-01	461.59	+	125	125
UC-02	489.21	-	2000	2000
UC-03	489.21	-	2000	1000
UC-04	459.64	-	-	-
UC-05	471.67	-	-	-
UC-06	471.67	-	2000	1000
UC-07	459.64	-	200	125
UC-08	471.67	-	1000	1000
UC-09	471.67	-	2000	1000
UC-10	596.88	-	-	-
UC-11	503.12	-	200	200
UC-12	558.75	-	1000	1000
UC-13	558.75	-	-	-
UC-14	380.57	-	-	-
UC-15	428.58	+	<62.5	<62.5
UC-16	447.03	-	2000	1000
UC-17	596.88	-	-	-
UC-18	544.77	-	-	-
UC-19	488.68	-	-	-
UC-20	420.54	-	-	-
UC-21	360.49	-	-	-
UC-22	434.56	-	-	-
UC-23	374.52	-	-	-
UC-24	256.27	-	-	-
UC-25	270.28	-	-	-
UC-26	271.29	-	-	-
UC-27	228.22	+	200	200
UC-28	228.22	+	200	200
UC-29	334.3	-	-	-
		Note: + indicates able to inhibit/kill S. aureus; - indicates unable to inhibit/ kill S. aureus.
